# Supplementary material
Source: Springer Nature journal article supplement (https://www.springermedizin.de/resource/supplementary/11689_2013_61_MOESM1_ESM.pdf/9673156)

Figures for the association analyses which used SNP data: ELS, RLS, NWR, and case-control. The regional association plots were generated with LocusZoom (Pruim RJ, Welch RP, Sanna S, Teslovich TM, Chines PS, Gliedt TP, Boehnke M, Abecasis GR, Willer CJ. (2010) LocusZoom: Regional visualization of genome-wide association scan results. *Bioinformatics* 2010, **26**: 2336-2337)

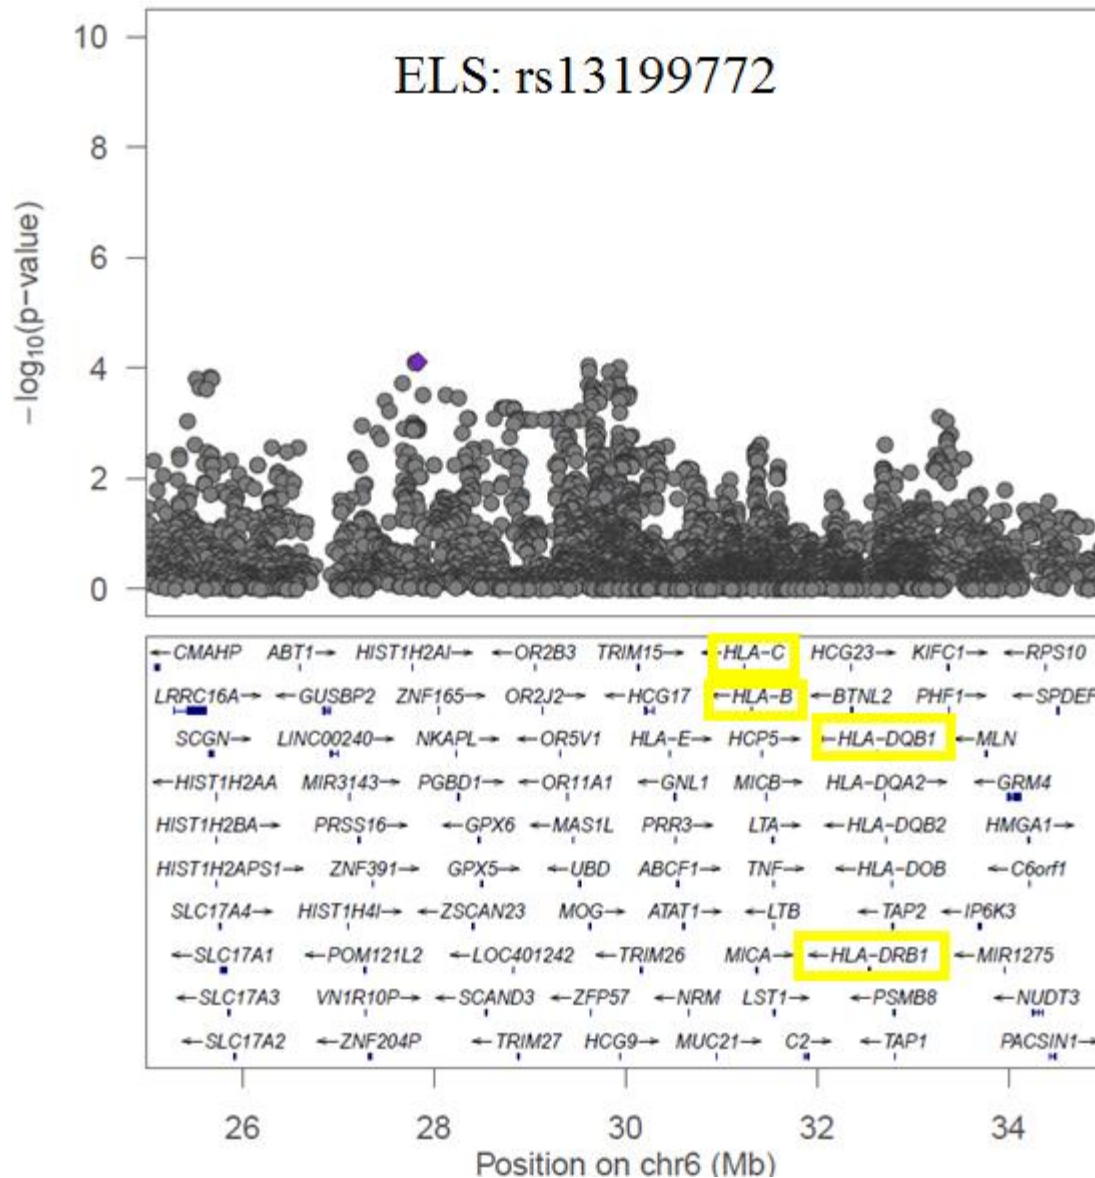

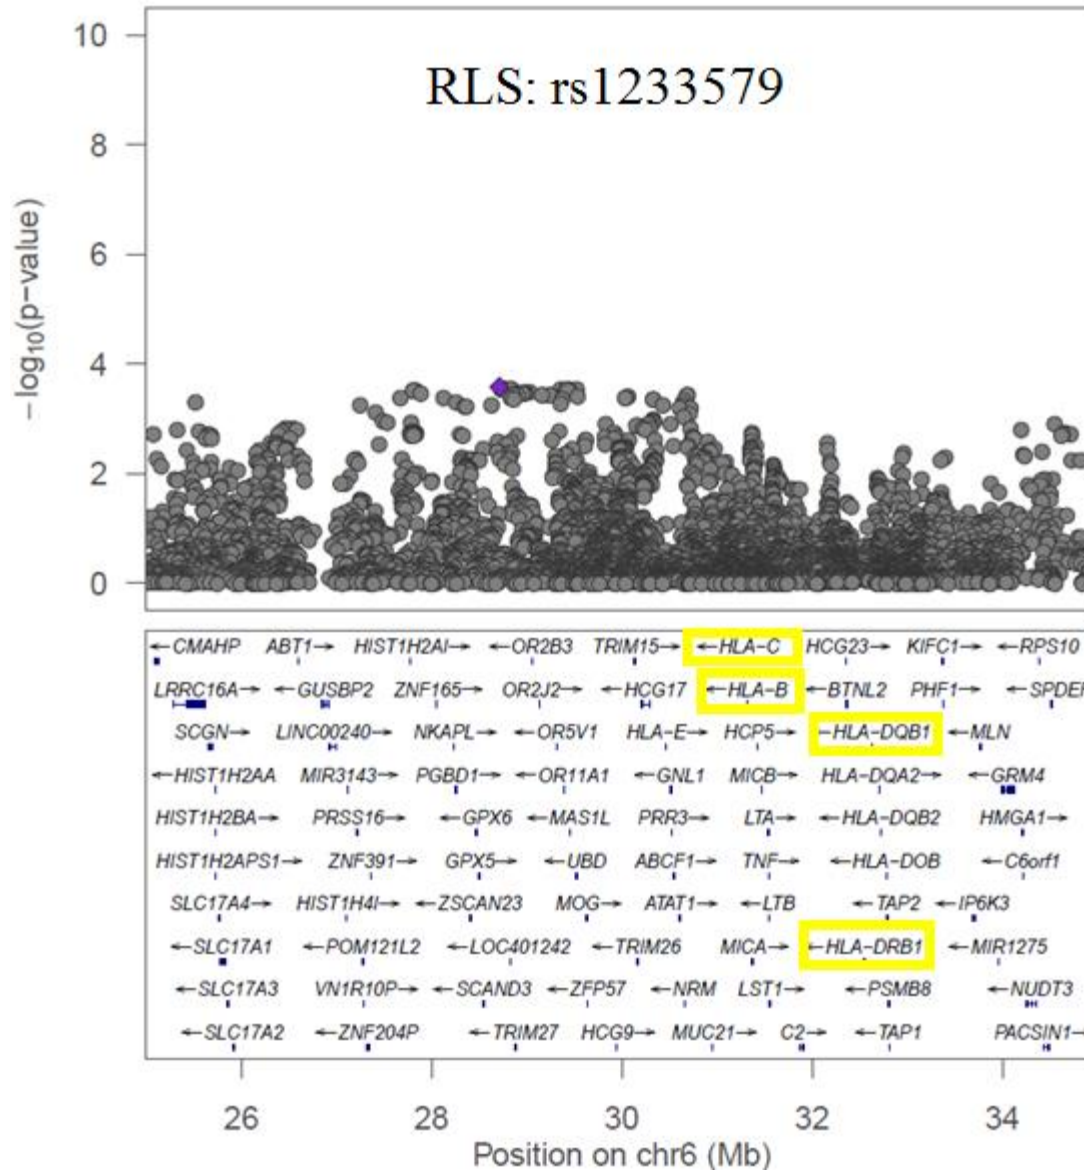

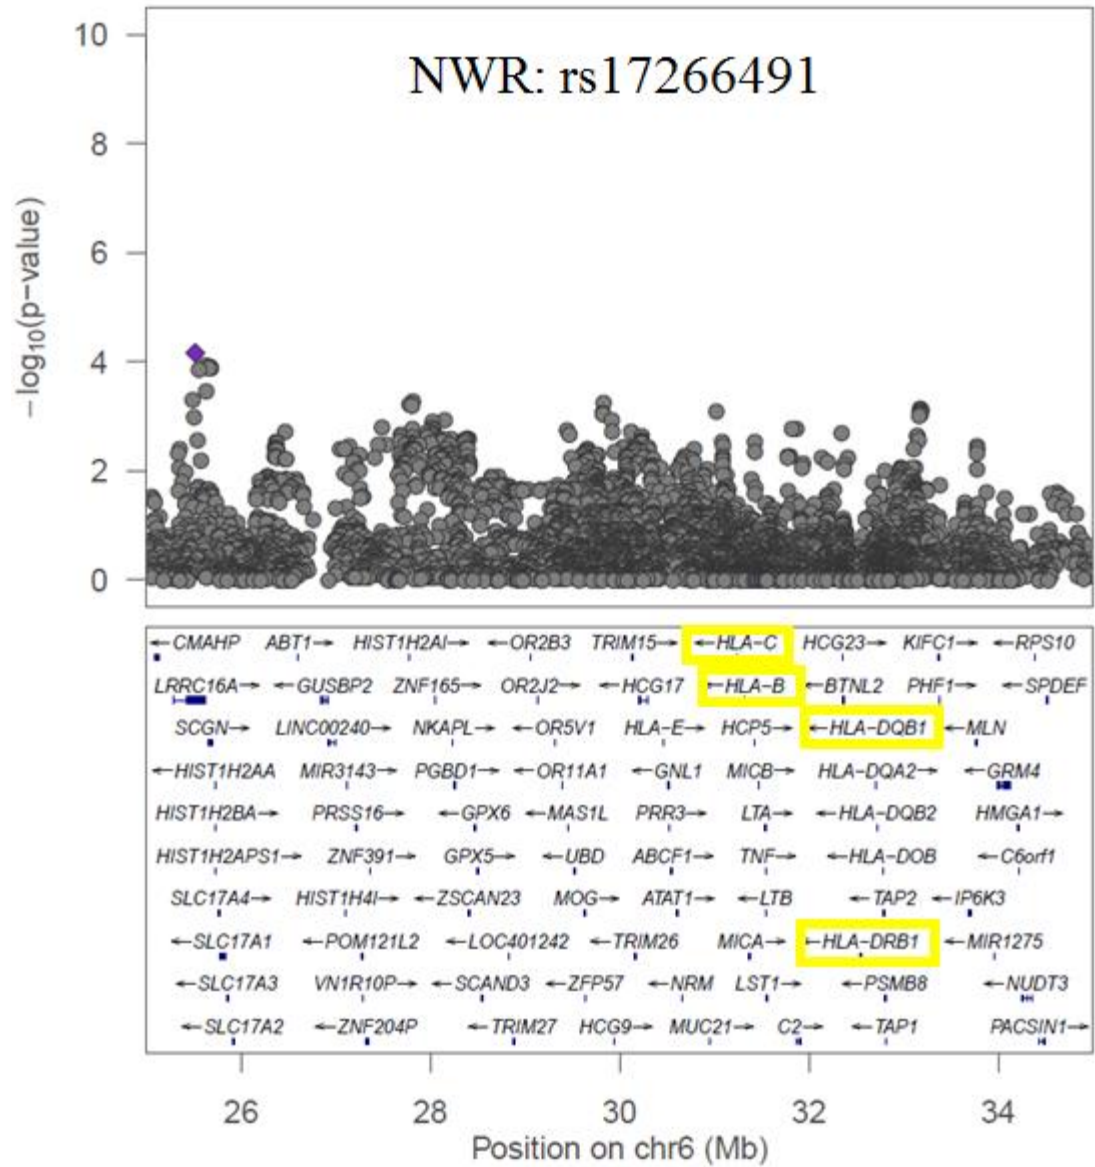

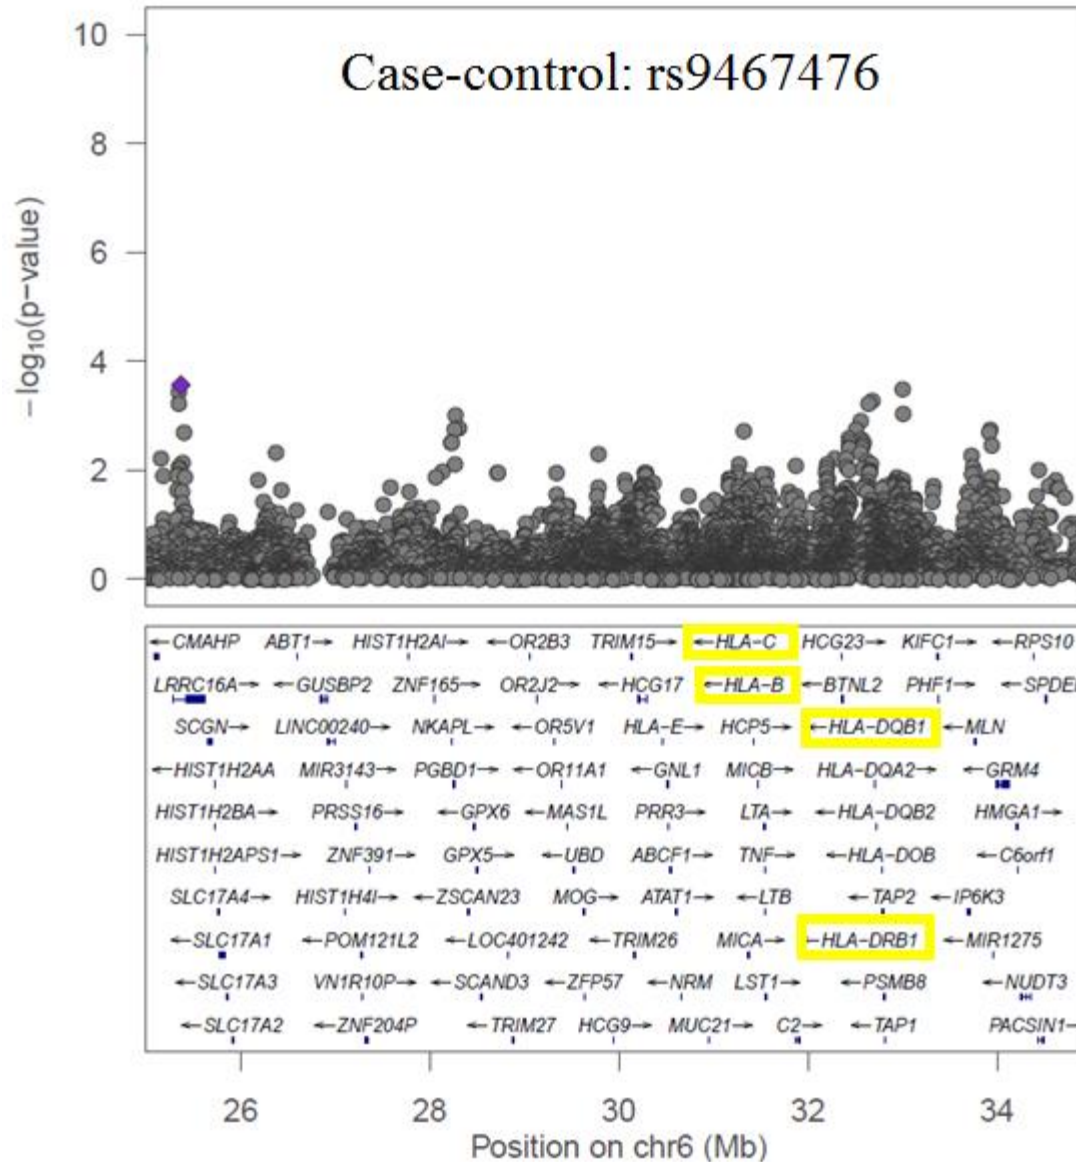

# Distributions of quantitative traits in our sample

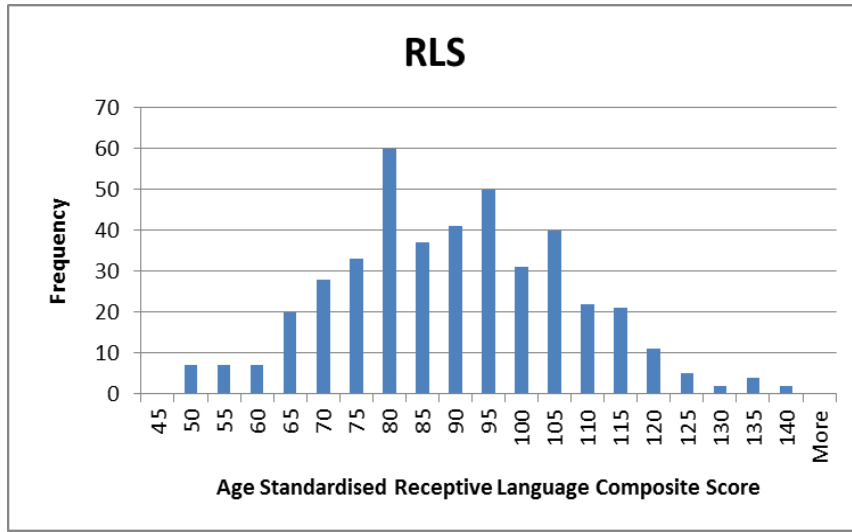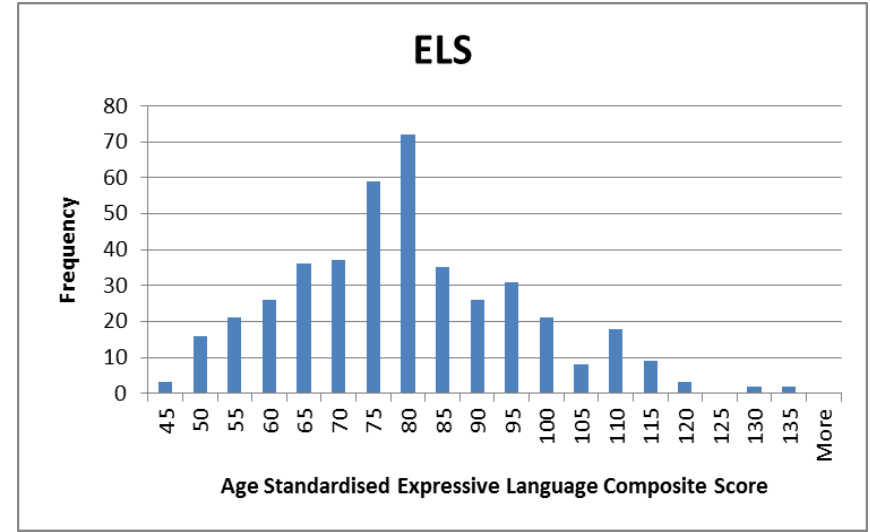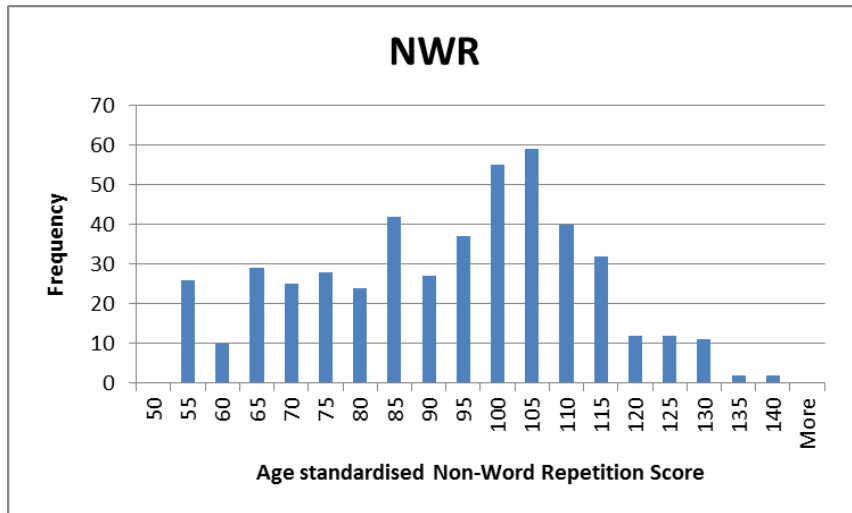

Supplement: MOESM1 [file 9673156]
